# Supplementary material for: A meta-GGA level screened range-separated hybrid functional by employing short range Hartree–Fock with a long range semilocal functional
Source: Royal Society of Chemistry journal article supplement (doi:10.1039/c8cp00333e), 2018-01-01
Supplement: c8cp00333e1.pdf [file c8cp00333e1.pdf]

## The meta-GGA level screened range-separated hybrid functional by employing short range Hartree-Fock with long range semilocal functional

Subrata Jana<sup>1,\*</sup> and Prasanjit Samal<sup>1,†</sup>

<sup>1</sup>*School of Physical Sciences, National Institute of Science Education and Research, HBNI, Bhubaneswar 752050, India*

(Dated: February 24, 2018)

- 
- [1] R. Peverati and D.G. Truhlar, Phys. Phil.Trans. R. Soc. A **372**, 20120476 (2011).  
[2] Subhas J. Chakravorty, Steven R. Gwaltney, and Ernest R. Davidson, Phys. Rev. A **47**, 3649 (1993).  
[3] R. Haunschild, and W. Klopper, J. Chem. Phys., **136**, 164102 (2012).  
[4] Y. Zhao, J. Pu, B.J. Lynch, and D.G. Truhlar, Phys. Chem. Chem. Phys. **6**, 673 (2004).  
[5] B. Patra, S. Jana and P. Samal (submitted).

---

\* subrata.jana@niser.ac.in

† psamal@niser.ac.in

TABLE I: Total energies of atoms (hartree) computed using aug-cc-pVQZ basis set. The accurate reference values of each atomic systems are taken from ref. [1, 2].

| Atom | Accurate | B3LYP    | PBE0     | TPSSh    | HSE06    | DME-sc-TPSSc |
|------|----------|----------|----------|----------|----------|--------------|
| H    | -0.500   | -0.502   | -0.501   | -0.500   | -0.503   | -0.499       |
| He   | -2.904   | -2.915   | -2.895   | -2.908   | -2.902   | -2.910       |
| Li   | -7.478   | -7.492   | -7.466   | -7.487   | -7.475   | -7.490       |
| Be   | -14.667  | -14.672  | -14.636  | -14.670  | -14.647  | -14.674      |
| B    | -24.654  | -24.664  | -24.619  | -24.666  | -24.632  | -24.670      |
| C    | -37.845  | -37.860  | -37.806  | -37.863  | -37.821  | -37.863      |
| N    | -54.589  | -54.605  | -54.545  | -54.611  | -54.562  | -54.605      |
| O    | -75.067  | -75.099  | -75.021  | -75.102  | -75.040  | -75.092      |
| F    | -99.734  | -99.773  | -99.679  | -99.769  | -99.700  | -99.748      |
| Ne   | -128.938 | -128.977 | -128.868 | -128.968 | -128.890 | -128.937     |
| Na   | -162.255 | -162.298 | -162.182 | -162.288 | -162.205 | -162.253     |
| Mg   | -200.053 | -200.098 | -199.967 | -200.082 | -199.992 | -200.042     |
| Al   | -242.346 | -242.393 | -242.254 | -242.379 | -242.280 | -242.327     |
| Si   | -289.359 | -289.399 | -289.256 | -289.391 | -289.283 | -289.327     |
| P    | -341.259 | -341.288 | -341.143 | -341.287 | -341.171 | -341.212     |
| S    | -398.110 | -398.142 | -397.983 | -398.139 | -398.013 | -398.053     |
| Cl   | -460.148 | -460.178 | -460.009 | -460.175 | -460.039 | -460.074     |
| MAE  |          | 0.026    | 0.063    | 0.022    | 0.044    | 0.021        |

TABLE II: Atomization energies of the G2 test set computed using aug-cc-pVQZ basis set. All quantities are in kcal/mol. CCSD(T) values are taken from ref [3]

| Molecule                                     | Name                  | CCSD(T) | B3LYP   | PBE0    | TPSSh   | HSE06   | DME-sc-TPSSc |
|----------------------------------------------|-----------------------|---------|---------|---------|---------|---------|--------------|
| AlCl <sub>3</sub>                            | Aluminum trichloride  | 313.454 | 293.202 | 304.142 | 302.176 | 298.920 | 314.406      |
| AlF <sub>3</sub>                             | Aluminum trifluoride  | 432.192 | 415.208 | 411.605 | 412.195 | 406.825 | 415.663      |
| BCl <sub>3</sub>                             | Boron trichloride     | 323.172 | 312.892 | 328.359 | 318.887 | 321.741 | 328.278      |
| BF <sub>3</sub>                              | Boron trifluoride     | 469.403 | 464.873 | 466.460 | 459.390 | 459.986 | 459.737      |
| BeH                                          | Berilium monohydride  | 50.789  | 58.113  | 55.985  | 50.197  | 55.948  | 59.035       |
| CCl <sub>4</sub>                             | Tetrachloromethane    | 313.633 | 294.972 | 317.493 | 305.412 | 307.687 | 322.960      |
| CF <sub>4</sub>                              | Tetrafluoromethane    | 478.081 | 468.906 | 478.858 | 468.327 | 468.783 | 473.488      |
| CH                                           | Methylidyne radical   | 83.869  | 85.561  | 83.008  | 86.609  | 83.623  | 86.746       |
| CH <sub>2</sub> Cl <sub>2</sub>              | Dichloromethane       | 370.105 | 363.661 | 372.625 | 370.492 | 366.442 | 375.302      |
| CH <sub>2</sub> F <sub>2</sub>               | Difluoromethane       | 436.843 | 435.229 | 436.739 | 437.229 | 430.501 | 437.080      |
| CH <sub>2</sub> O <sub>2</sub>               | Formic acid           | 500.306 | 498.830 | 500.369 | 493.422 | 493.313 | 491.616      |
| CH <sub>2</sub> O                            | Formaldehyde          | 373.210 | 373.530 | 372.150 | 371.701 | 368.032 | 370.714      |
| CH <sub>2</sub>                              | Singlet carbene       | 180.619 | 181.028 | 176.432 | 180.619 | 175.233 | 180.033      |
| CH <sub>2</sub>                              | Triplet carbene       | 189.742 | 192.264 | 193.716 | 198.372 | 192.235 | 195.453      |
| CH <sub>3</sub> Cl                           | Chloromethane         | 394.518 | 392.717 | 395.368 | 397.937 | 390.766 | 398.126      |
| CH <sub>3</sub>                              | Methyl radical        | 306.590 | 310.204 | 308.517 | 313.852 | 306.314 | 310.930      |
| CH <sub>3</sub> O                            | Hydroxymethyl radical | 408.552 | 411.164 | 410.924 | 410.911 | 405.986 | 406.028      |
| CH <sub>3</sub> O                            | Methoxy radical       | 398.894 | 403.937 | 403.132 | 405.078 | 398.573 | 400.955      |
| CH <sub>3</sub> S                            | Methylthio radical    | 381.246 | 382.346 | 384.332 | 386.415 | 379.841 | 381.979      |
| CH <sub>4</sub>                              | Methane               | 418.872 | 421.224 | 417.861 | 424.748 | 414.689 | 421.096      |
| CH <sub>4</sub> O                            | Methanol              | 511.829 | 511.982 | 510.089 | 511.973 | 504.388 | 507.297      |
| CH <sub>4</sub> S                            | Thiomethanol          | 473.495 | 471.634 | 472.869 | 477.136 | 467.419 | 475.058      |
| CHCl <sub>3</sub>                            | Trichloromethane      | 343.726 | 331.733 | 347.317 | 340.229 | 339.399 | 350.778      |
| CHF <sub>3</sub>                             | Trifluoromethane      | 458.777 | 453.630 | 459.068 | 454.456 | 450.947 | 456.693      |
| CHO                                          | Formyl radical        | 278.282 | 280.381 | 280.297 | 278.037 | 276.853 | 277.268      |
| CN                                           | Cyano radical         | 180.065 | 178.840 | 178.247 | 175.409 | 175.927 | 178.971      |
| CNH                                          | Hydrogen cyanide      | 311.523 | 312.502 | 310.083 | 307.926 | 306.936 | 311.384      |
| CNH <sub>3</sub> O <sub>2</sub>              | Methyl nitrite        | 597.491 | 598.763 | 599.394 | 597.417 | 589.594 | 600.172      |
| CNH <sub>3</sub> O <sub>2</sub>              | Nitromethane          | 599.632 | 602.577 | 604.904 | 600.381 | 595.005 | 602.773      |
| CNH <sub>5</sub>                             | Methylamine           | 580.082 | 584.793 | 581.720 | 585.121 | 575.592 | 581.165      |
| C <sub>2</sub> Cl <sub>4</sub>               | Tetrachloroethylene   | 469.319 | 451.178 | 479.107 | 462.009 | 466.800 | 479.017      |
| C <sub>2</sub> F <sub>4</sub>                | Tetrafluoroethylene   | 587.668 | 584.157 | 596.684 | 583.310 | 584.511 | 588.466      |
| C <sub>2</sub> H                             | Ethynyl radical       | 263.659 | 262.757 | 266.490 | 262.267 | 263.119 | 261.660      |
| C <sub>2</sub> H <sub>2</sub>                | Acetylene             | 402.763 | 403.153 | 404.139 | 401.988 | 399.953 | 402.015      |
| C <sub>2</sub> H <sub>2</sub> O <sub>2</sub> | Glyoxal               | 632.360 | 630.604 | 634.689 | 625.389 | 625.829 | 625.606      |
| C <sub>2</sub> H <sub>3</sub> O              | Ketene                | 530.603 | 533.813 | 537.741 | 531.309 | 531.043 | 530.538      |
| C <sub>2</sub> H <sub>3</sub> Cl             | Vinyl Chloride        | 541.516 | 539.705 | 546.643 | 544.055 | 539.583 | 545.584      |
| C <sub>2</sub> H <sub>3</sub>                | Vinyl radical         | 443.495 | 447.689 | 449.933 | 450.301 | 445.269 | 447.579      |
| C <sub>2</sub> H <sub>3</sub> F              | Vinyl fluoride        | 571.223 | 572.586 | 575.603 | 574.272 | 568.497 | 573.267      |
| C <sub>2</sub> H <sub>3</sub> O              | Carbonyl methane      | 579.876 | 582.681 | 586.206 | 582.575 | 579.056 | 579.508      |
| C <sub>2</sub> H <sub>3</sub> OCl            | Acetyl chloride       | 666.141 | 663.119 | 672.060 | 665.272 | 662.502 | 667.383      |
| C <sub>2</sub> H <sub>3</sub> OF             | Acetyl fluoride       | 704.174 | 702.790 | 708.625 | 702.189 | 698.904 | 701.127      |
| C <sub>2</sub> H <sub>4</sub>                | Ethylene              | 561.341 | 563.715 | 564.026 | 566.248 | 558.549 | 563.460      |
| C <sub>2</sub> H <sub>4</sub> O <sub>2</sub> | Acetic acid           | 800.868 | 798.778 | 804.219 | 795.331 | 793.291 | 792.064      |
| C <sub>2</sub> H <sub>4</sub> O <sub>2</sub> | Methyl formate        | 784.033 | 782.802 | 786.502 | 781.639 | 775.770 | 779.339      |
| C <sub>2</sub> H <sub>4</sub> O              | Acetaldehyde          | 675.005 | 675.749 | 678.197 | 675.912 | 670.265 | 672.746      |
| C <sub>2</sub> H <sub>4</sub> O              | Oxirane               | 648.827 | 648.389 | 654.618 | 653.490 | 646.021 | 650.030      |
| C <sub>2</sub> H <sub>4</sub> S              | Thiirane              | 623.588 | 619.677 | 629.933 | 628.913 | 621.384 | 627.489      |
| C <sub>2</sub> H <sub>5</sub> Cl             | Ethyl chloride        | 690.032 | 687.116 | 693.581 | 694.724 | 685.145 | 693.489      |
| C <sub>2</sub> H <sub>5</sub>                | Ethyl radical         | 601.427 | 605.718 | 607.585 | 611.654 | 601.652 | 606.016      |
| C <sub>2</sub> H <sub>5</sub> O              | Ethoxy radical        | 695.120 | 695.919 | 698.855 | 699.301 | 690.471 | 693.688      |
| C <sub>2</sub> H <sub>6</sub>                | Ethane                | 710.204 | 712.113 | 712.371 | 718.143 | 705.519 | 712.034      |
| C <sub>2</sub> H <sub>6</sub> O              | Dimethyl ether        | 796.040 | 796.596 | 797.168 | 800.651 | 787.769 | 795.623      |
| C <sub>2</sub> H <sub>6</sub> O              | Ethanol               | 808.220 | 807.325 | 809.175 | 809.495 | 799.634 | 803.327      |
| C <sub>2</sub> H <sub>6</sub> OS             | Dimethyl sulfoxide    | 854.413 | 845.880 | 852.485 | 852.760 | 840.628 | 850.025      |
| C <sub>2</sub> H <sub>6</sub> S              | Dimethyl sulfide      | 766.299 | 763.395 | 768.400 | 772.005 | 759.221 | 768.416      |
| C <sub>2</sub> H <sub>6</sub> S              | Thioethanol           | 767.393 | 764.115 | 769.258 | 772.090 | 759.960 | 768.727      |
| C <sub>2</sub> N <sub>2</sub>                | Cyanogen              | 498.280 | 501.221 | 502.594 | 492.144 | 496.098 | 500.305      |

TABLE III: Atomization energies of the G2 test set computed using aug-cc-pVQZ basis set. All quantities are in kcal/mol. CCSD(T) values are taken from ref [3]

| Molecule                         | Name                  | CCSD(T)  | B3LYP    | PBE0     | TPSSh    | HSE06    | DME-sc-TPSSc |
|----------------------------------|-----------------------|----------|----------|----------|----------|----------|--------------|
| C <sub>2</sub> NF <sub>3</sub>   | Trifluoroacetonitril  | 639.494  | 633.221  | 643.356  | 628.465  | 631.486  | 636.709      |
| C <sub>2</sub> NH <sub>3</sub>   | Acetonitrile          | 613.275  | 615.730  | 617.186  | 613.745  | 610.351  | 614.196      |
| C <sub>2</sub> NH <sub>5</sub>   | Aziridine             | 717.130  | 720.420  | 726.284  | 725.154  | 717.109  | 722.287      |
| C <sub>2</sub> NH <sub>5</sub> O | Acetamide             | 864.915  | 868.547  | 872.338  | 865.155  | 861.016  | 862.778      |
| C <sub>2</sub> NH <sub>7</sub>   | Dimethylamine         | 867.075  | 871.340  | 871.603  | 874.967  | 861.670  | 870.369      |
| C <sub>2</sub> NH <sub>7</sub>   | Ethaylamine           | 875.261  | 878.751  | 879.523  | 881.377  | 869.545  | 876.087      |
| C <sub>3</sub> H <sub>4</sub>    | Allene                | 699.982  | 704.981  | 709.655  | 706.774  | 701.792  | 704.232      |
| C <sub>3</sub> H <sub>4</sub>    | Cyclopropene          | 678.007  | 679.304  | 689.130  | 685.124  | 680.583  | 682.053      |
| C <sub>3</sub> H <sub>4</sub>    | Propyne               | 701.358  | 702.843  | 707.787  | 704.337  | 699.904  | 701.435      |
| C <sub>3</sub> H <sub>6</sub>    | Cyclopropane          | 849.824  | 850.449  | 860.044  | 859.272  | 849.966  | 853.668      |
| C <sub>3</sub> H <sub>6</sub> O  | Acetone               | 975.379  | 975.183  | 981.651  | 977.443  | 969.802  | 973.123      |
| C <sub>3</sub> H <sub>6</sub>    | Propene               | 857.410  | 859.388  | 863.671  | 864.342  | 854.387  | 859.575      |
| C <sub>3</sub> H <sub>7</sub> Cl | 1-Chloropropane       | 983.574  | 979.160  | 989.532  | 989.210  | 977.252  | 986.708      |
| C <sub>3</sub> H <sub>7</sub>    | Isopropyl radical     | 897.482  | 901.550  | 907.230  | 909.774  | 897.472  | 902.323      |
| C <sub>3</sub> H <sub>8</sub> O  | Methoxyethane         | 1092.532 | 1091.878 | 1096.215 | 1098.144 | 1082.975 | 1091.623     |
| C <sub>3</sub> H <sub>8</sub> O  | Isopropyl alcohol     | 1105.317 | 1102.360 | 1108.267 | 1106.745 | 1094.719 | 1100.294     |
| C <sub>3</sub> H <sub>8</sub>    | Propane               | 1003.629 | 1004.219 | 1008.352 | 1012.632 | 997.659  | 1005.243     |
| C <sub>3</sub> NH <sub>3</sub>   | Acrylontrile          | 758.512  | 761.469  | 766.395  | 758.771  | 757.308  | 760.737      |
| C <sub>3</sub> NH <sub>9</sub>   | Trimethylamine        | 1156.873 | 1159.400 | 1163.365 | 1166.420 | 1149.386 | 1162.611     |
| C <sub>4</sub> H <sub>10</sub>   | Isobutane             | 1298.551 | 1296.761 | 1305.079 | 1307.566 | 1290.357 | 1300.143     |
| C <sub>4</sub> H <sub>10</sub>   | n-Butane              | 1297.126 | 1296.254 | 1304.289 | 1307.093 | 1289.745 | 1298.453     |
| C <sub>4</sub> H <sub>4</sub> O  | Furan                 | 990.051  | 988.793  | 1006.342 | 992.032  | 991.696  | 990.474      |
| C <sub>4</sub> H <sub>4</sub> S  | Thiophene             | 959.884  | 954.121  | 975.908  | 962.274  | 961.478  | 962.981      |
| C <sub>4</sub> H <sub>6</sub>    | 1,3-Butadiene         | 1007.991 | 1010.584 | 1018.587 | 1014.761 | 1006.996 | 1011.609     |
| C <sub>4</sub> H <sub>6</sub>    | 2-Butyne              | 999.002  | 1001.183 | 1010.107 | 1005.471 | 998.529  | 999.708      |
| C <sub>4</sub> H <sub>6</sub>    | Bicyclobutane         | 981.134  | 979.529  | 998.760  | 992.053  | 985.475  | 987.505      |
| C <sub>4</sub> H <sub>6</sub>    | Cyclobutene           | 996.655  | 995.318  | 1010.303 | 1004.075 | 997.495  | 999.252      |
| C <sub>4</sub> H <sub>6</sub>    | Methylenecyclopropane | 988.022  | 990.275  | 1003.777 | 998.218  | 991.407  | 993.245      |
| C <sub>4</sub> H <sub>8</sub>    | Cyclobutane           | 1145.231 | 1142.726 | 1157.149 | 1154.374 | 1142.893 | 1147.500     |
| C <sub>4</sub> H <sub>8</sub>    | Isobutene             | 1154.236 | 1154.729 | 1163.187 | 1162.111 | 1149.961 | 1156.481     |
| C <sub>4</sub> H <sub>9</sub>    | tert-Butyl radical    | 1194.236 | 1197.132 | 1206.877 | 1207.749 | 1193.175 | 1199.450     |
| C <sub>4</sub> NH <sub>5</sub>   | Pyrrrole              | 1067.054 | 1070.436 | 1087.746 | 1073.116 | 1072.486 | 1071.863     |
| C <sub>5</sub> H <sub>8</sub>    | Spiropentane          | 1278.794 | 1277.914 | 1300.528 | 1292.036 | 1283.538 | 1285.290     |
| C <sub>5</sub> NH <sub>5</sub>   | Pyridine              | 1232.274 | 1236.854 | 1256.774 | 1238.723 | 1239.437 | 1239.671     |
| C <sub>6</sub> H <sub>6</sub>    | Benzene               | 1361.588 | 1362.890 | 1386.658 | 1368.504 | 1368.384 | 1366.305     |
| Cl <sub>2</sub>                  | Dichlorine            | 59.073   | 54.819   | 58.792   | 58.400   | 56.531   | 65.282       |
| CO                               | Carbon monoxide       | 258.877  | 254.690  | 254.661  | 249.394  | 251.854  | 251.872      |
| CO <sub>2</sub>                  | Carbon dioxide        | 388.592  | 387.229  | 390.682  | 380.854  | 385.210  | 382.137      |
| COF <sub>2</sub>                 | Carbonyl fluoride     | 419.501  | 415.705  | 422.000  | 412.298  | 414.299  | 414.866      |
| COS                              | Carbonyl sulfide      | 334.288  | 332.011  | 337.079  | 330.313  | 331892   | 334.300      |
| CS                               | Carbon monosulfide    | 170.985  | 165.664  | 167.371  | 165.176  | 164.873  | 169.891      |
| CS <sub>2</sub>                  | Carbon disulphide     | 278.664  | 275.291  | 282.292  | 278.128  | 277.486  | 284.925      |
| FCl                              | Chlorine monofluoride | 62.572   | 60.189   | 60.176   | 61.917   | 57.899   | 66.998       |
| F <sub>2</sub>                   | Difluorine            | 38.755   | 36.916   | 34.395   | 39.113   | 32.179   | 44.097       |
| F <sub>3</sub> Cl                | Chlorine trifluoride  | 128.346  | 126.029  | 127.172  | 132.329  | 120.509  | 140.060      |
| HCl                              | Hydrogen Chloride     | 107.199  | 104.859  | 104.744  | 106.276  | 103.607  | 108.920      |
| HF                               | Hydrogen fluoride     | 141.513  | 139.300  | 136.814  | 137.582  | 135.536  | 137.245      |
| HOCl                             | Hypochlorous acid     | 165.791  | 162.596  | 162.203  | 161.875  | 158.833  | 164.158      |
| HO                               | Hydroxyl radical      | 106.955  | 108.307  | 105.743  | 105.745  | 104.782  | 102.992      |
| HS                               | Mercapto radical      | 87.390   | 87.987   | 86.525   | 88.815   | 85.675   | 86.932       |
| H <sub>2</sub>                   | Dihydrgen             | 109.400  | 110.280  | 104.301  | 112.659  | 104.645  | 111.769      |
| H <sub>2</sub> O <sub>2</sub>    | Hydrogen peroxide     | 268.655  | 267.134  | 262.887  | 262.457  | 258.456  | 260.590      |
| H <sub>2</sub> O                 | Water                 | 232.565  | 231.099  | 227.101  | 226.927  | 224.867  | 224.026      |
| H <sub>2</sub> S                 | Hydrogen sulphide     | 183.298  | 181.640  | 179.444  | 183.955  | 177.571  | 184.373      |
| LiF                              | Lithium fluoride      | 139.369  | 137.167  | 132.051  | 133.653  | 131.248  | 132.606      |
| LiH                              | Lithium hydride       | 57.904   | 5/.587   | 52.837   | 58.930   | 53.159   | 58.544       |
| Li <sub>2</sub>                  | Dilithium             | 24.197   | 20.893   | 19.428   | 22.802   | 19.427   | 21.801       |
| Na <sub>2</sub>                  | Disodium              | 17.101   | 17.171   | 15.846   | 18.621   | 16.09    | 18.502       |

TABLE IV: Atomization energies of the G2 test set computed using aug-cc-pVQZ basis set. All quantities are in kcal/mol. CCSD(T) values are taken from ref [3]

| Molecule                       | Name                   | CCSD(T) | B3LYP   | PBE0    | TPSSh   | HSE06   | DME-sc-TPSSc |
|--------------------------------|------------------------|---------|---------|---------|---------|---------|--------------|
| NaCl                           | Sodium chloride        | 98.466  | 92.408  | 93.233  | 95.450  | 92.396  | 98.813       |
| NF <sub>3</sub>                | Trifluoroamine         | 206.212 | 208.298 | 209.523 | 209.636 | 202.512 | 218.529      |
| NH <sub>2</sub>                | Amino radical          | 181.955 | 188.202 | 183.288 | 186.482 | 181.972 | 185.089      |
| NH <sub>3</sub>                | Ammonia                | 297.070 | 301.308 | 295.236 | 298.214 | 292.708 | 296.254      |
| NH                             | Imidogen               | 82.787  | 88.145  | 85.303  | 89.103  | 84.877  | 89.148       |
| NO <sub>2</sub>                | Nitrogen dioxide       | 227.058 | 232.132 | 232.437 | 228.103 | 227.241 | 231.431      |
| NOCl                           | Nitrosyl chloride      | 191.468 | 192.707 | 191.666 | 191.834 | 187.567 | 200.729      |
| NO                             | Nitric oxide           | 152.187 | 155.495 | 153.713 | 150.182 | 151.113 | 153.316      |
| N <sub>2</sub>                 | Dinitrogen             | 227.436 | 227.445 | 222.948 | 219.968 | 220.728 | 227.207      |
| N <sub>2</sub> H <sub>4</sub>  | Hydrazine              | 436.699 | 444.594 | 438.495 | 439.404 | 433.072 | 437.764      |
| N <sub>2</sub> O               | Nitrous oxide          | 269.474 | 273.123 | 272.142 | 267.847 | 267.285 | 274.542      |
| OCl                            | Monochlorine monoxide  | 64.532  | 65.219  | 65.919  | 65.888  | 63.520  | 65.014       |
| OF <sub>2</sub>                | Difluorine monoxide    | 93.772  | 93.550  | 90.927  | 95.662  | 86.399  | 101.661      |
| OS                             | Sulphur monoxide       | 125.796 | 124.787 | 124.583 | 123.450 | 121.933 | 122.416      |
| O <sub>2</sub>                 | Dioxygen               | 120.545 | 122.512 | 122.239 | 119.475 | 119.352 | 120.215      |
| O <sub>2</sub> S               | Sulphur dioxide        | 259.766 | 244.873 | 245.509 | 242.371 | 240.056 | 245.441      |
| O <sub>3</sub>                 | Ozone                  | 146.819 | 138.562 | 135.859 | 137.995 | 130.688 | 142.984      |
| P <sub>2</sub>                 | Diphosphorus           | 115.951 | 114.437 | 109.760 | 111.021 | 107.831 | 118.659      |
| PF <sub>3</sub>                | Phosphorus trifluoride | 365.156 | 356.327 | 353.282 | 353.311 | 346.720 | 358.472      |
| PH <sub>2</sub>                | Phosphino radical      | 153.970 | 158.278 | 152.688 | 160.081 | 151.574 | 158.581      |
| PH <sub>3</sub>                | Phosphane              | 241.475 | 244.201 | 236.754 | 247.599 | 234.807 | 247.906      |
| S <sub>2</sub>                 | Disulphur              | 103.112 | 102.127 | 105.408 | 104.785 | 102.947 | 103.256      |
| SiCH <sub>6</sub>              | Methylsilane           | 627.656 | 625.703 | 621.001 | 637.227 | 615.352 | 635.468      |
| SiCl <sub>4</sub>              | Silicon tetrachloride  | 388.483 | 361.134 | 380.051 | 374.291 | 371.568 | 391.150      |
| SiF <sub>4</sub>               | Silicon tetrafluoride  | 577.546 | 554.321 | 552.458 | 550.756 | 544.495 | 556.948      |
| SiH <sub>2</sub>               | Singlet silylene       | 153.678 | 153.585 | 147.022 | 156.112 | 146.174 | 158.040      |
| SiH <sub>2</sub>               | Triplet silylene       | 133.260 | 133.158 | 132.205 | 141.321 | 131.164 | 138.881      |
| SiH <sub>3</sub>               | Silyl radical          | 228.083 | 228.539 | 223.423 | 237.069 | 221.988 | 235.663      |
| SiH <sub>4</sub>               | Silane                 | 324.589 | 323.671 | 315.092 | 333.551 | 313.157 | 335.321      |
| SiO                            | Silicon monoxide       | 192.359 | 186.596 | 181.364 | 181.082 | 178.994 | 183.946      |
| Si <sub>2</sub> H <sub>6</sub> | Disilane               | 535.471 | 530.474 | 522.354 | 548.331 | 517.857 | 550.941      |
| Si <sub>2</sub>                | Disilicon              | 73.411  | 69.314  | 71.365  | 72.311  | 69.934  | 72.577       |
| MAE                            | —                      | —       | 3.599   | 5.619   | 5.296   | 5.335   | 4.008        |

TABLE V: Atomization energies (kcal/mol) of the AE6 molecules. The experimental values are taken from [1, 4]. All calculations are done using aug-cc-pVQZ basis set.

| Atom                                         | Expt.  | B3LYP  | PBE0   | TPSSh  | HSE06  | DME-sc-TPSSc |
|----------------------------------------------|--------|--------|--------|--------|--------|--------------|
| SiH <sub>4</sub>                             | 322.4  | 323.4  | 315.0  | 333.5  | 313.1  | 335.3        |
| SiO                                          | 192.1  | 187.1  | 182.0  | 181.4  | 179.6  | 184.2        |
| S <sub>2</sub>                               | 101.7  | 102.1  | 105.7  | 104.8  | 103.2  | 103.2        |
| C <sub>3</sub> H <sub>4</sub>                | 704.8  | 703.2  | 708.1  | 704.6  | 700.2  | 701.6        |
| C <sub>2</sub> H <sub>2</sub> O <sub>2</sub> | 633.4  | 631.4  | 635.8  | 625.9  | 626.9  | 626.0        |
| C <sub>4</sub> H <sub>8</sub>                | 1149.0 | 1142.8 | 1157.1 | 1154.4 | 1142.9 | 1147.4       |
| MAE                                          | —      | 2.7    | 5.8    | 6.3    | 6.7    | 5.7          |

TABLE VI: Ionization potential for the test set IP13 for the exchange-correlation functional shown in each column using 6-311++G(3df,3pd) basis set. The experimental values are taken from [1, 4]. All quantities are in kcal/mol.

| Molecule        | Expt   | B3LYP  | PBE0   | TPSSh  | HSE06  | DME-sc-TPSSc |
|-----------------|--------|--------|--------|--------|--------|--------------|
| C               | 259.74 | 266.08 | 265.57 | 264.06 | 265.53 | 261.54       |
| S               | 238.34 | 242.89 | 239.89 | 240.79 | 239.84 | 240.35       |
| SH              | 238.36 | 241.18 | 238.82 | 238.57 | 238.63 | 236.65       |
| Cl              | 299.31 | 301.22 | 298.86 | 298.67 | 298.79 | 295.86       |
| Cl <sub>2</sub> | 265.30 | 262.25 | 261.18 | 259.70 | 261.28 | 262.95       |
| OH              | 298.90 | 282.93 | 300.57 | 297.69 | 300.63 | 295.58       |
| O               | 313.67 | 326.21 | 319.66 | 321.62 | 320.15 | 322.35       |
| O <sub>2</sub>  | 278.90 | 289.60 | 286.30 | 284.33 | 286.64 | 280.21       |
| P               | 242.80 | 239.30 | 242.78 | 242.66 | 242.63 | 240.83       |
| PH              | 234.10 | 234.30 | 237.08 | 236.97 | 237.00 | 234.78       |
| PH <sub>2</sub> | 226.30 | 228.72 | 230.75 | 230.67 | 230.70 | 226.05       |
| S <sub>2</sub>  | 216.00 | 219.88 | 221.19 | 220.20 | 221.07 | 217.66       |
| Si              | 188.05 | 187.07 | 189.55 | 189.71 | 189.51 | 188.31       |
| MAE             | –      | 5.29   | 3.20   | 3.16   | 3.24   | 2.29         |

TABLE VII: Electron affinity for the test set EA13 for the exchange-correlation functional shown in each column using 6-311++G(3df,3pd) basis set. All quantities are in kcal/mol. The experimental values are taken from [1, 4]

| Molecule        | Expt  | B3LYP | PBE0  | TPSSh | HSE06 | DME-sc-TPSSc |
|-----------------|-------|-------|-------|-------|-------|--------------|
| C               | 29.19 | 31.20 | 32.34 | 31.86 | 31.95 | 29.29        |
| S               | 47.91 | 50.33 | 47.35 | 47.19 | 47.15 | 44.69        |
| SH              | 53.84 | 53.50 | 51.30 | 51.03 | 51.03 | 51.99        |
| Cl              | 84.24 | 84.65 | 82.51 | 82.24 | 82.09 | 83.81        |
| Cl <sub>2</sub> | 55.60 | 64.43 | 59.21 | 60.46 | 59.93 | 53.72        |
| OH              | 42.30 | 40.54 | 35.34 | 35.26 | 35.16 | 34.69        |
| O               | 33.77 | 36.84 | 30.48 | 29.85 | 30.46 | 25.97        |
| O <sub>2</sub>  | 10.80 | 11.37 | 4.72  | 6.69  | 5.29  | 3.65         |
| P               | 16.92 | 21.50 | 17.55 | 18.02 | 17.57 | 17.88        |
| PH              | 23.20 | 24.96 | 21.83 | 21.51 | 21.69 | 19.77        |
| PH <sub>2</sub> | 29.40 | 28.48 | 26.31 | 25.86 | 26.04 | 26.26        |
| S <sub>2</sub>  | 38.50 | 38.15 | 35.99 | 35.86 | 36.10 | 33.33        |
| Si              | 32.33 | 30.44 | 33.13 | 32.34 | 32.92 | 31.14        |
| MAE             | –     | 2.22  | 2.79  | 2.85  | 2.87  | 3.37         |

TABLE VIII: Proton affinities for the test set PA8 for the exchange-correlation functional shown in each column using 6-311++G(3df,3pd) basis set. All quantities are in kcal/mol. The experimental values are taken from [1, 4]

| Molecule                      | Expt   | B3LYP  | PBE0   | TPSSh  | HSE06  | DME-sc-TPSSc |
|-------------------------------|--------|--------|--------|--------|--------|--------------|
| NH <sub>3</sub>               | 211.90 | 210.99 | 212.64 | 213.74 | 213.10 | 214.42       |
| H <sub>2</sub> O              | 171.80 | 170.84 | 172.48 | 173.04 | 172.88 | 172.95       |
| C <sub>2</sub> H <sub>2</sub> | 156.60 | 158.67 | 161.07 | 162.92 | 161.51 | 161.97       |
| SiH <sub>4</sub>              | 156.50 | 157.53 | 156.61 | 159.03 | 157.65 | 159.43       |
| PH <sub>3</sub>               | 193.10 | 193.28 | 192.97 | 196.17 | 193.81 | 198.39       |
| H <sub>2</sub> S              | 173.70 | 174.92 | 175.07 | 176.88 | 175.85 | 177.77       |
| HCl                           | 137.10 | 138.15 | 139.15 | 140.39 | 139.48 | 140.84       |
| H <sub>2</sub>                | 105.90 | 104.53 | 106.35 | 108.14 | 106.62 | 106.46       |
| MAE                           | –      | 1.10   | 1.25   | 2.84   | 1.79   | 3.20         |

TABLE IX: FORWARD barrier heights of hydrogen transfer reactions for the HTBH38 test set for the exchange-correlation functional shown in each column using aug-cc-pVQZ basis set. All quantities are in kcal/mol. The experimental values are taken from [1, 4]

|     | Molecule                                                                                          | Expt  | B3LYP | PBE0  | TPSSh | HSE06 | DME-sc-TPSSc |
|-----|---------------------------------------------------------------------------------------------------|-------|-------|-------|-------|-------|--------------|
| 1.  | H + HCl → H <sub>2</sub> + Cl                                                                     | 5.70  | -1.00 | 2.72  | -3.63 | 2.66  | 1.06         |
| 2.  | OH + H <sub>2</sub> → H <sub>2</sub> O + H                                                        | 4.90  | 0.72  | 0.18  | 0.41  | 1.56  | 0.99         |
| 3.  | CH <sub>3</sub> + H <sub>2</sub> → CH <sub>4</sub> + H                                            | 12.10 | 8.78  | 6.94  | 8.00  | 8.23  | 8.93         |
| 4.  | OH + CH <sub>4</sub> → H <sub>2</sub> O + CH <sub>3</sub>                                         | 6.50  | 2.27  | 2.01  | 1.70  | 3.28  | 3.62         |
| 5.  | H + H <sub>2</sub> → H <sub>2</sub> + H                                                           | 9.60  | 4.28  | 5.66  | 1.16  | 6.09  | 2.04         |
| 6.  | OH + NH <sub>3</sub> → H <sub>2</sub> O + NH <sub>2</sub>                                         | 3.00  | -2.26 | -1.86 | -3.63 | -0.59 | -2.33        |
| 7.  | HCl + CH <sub>3</sub> → CH <sub>4</sub> + Cl                                                      | 1.70  | -1.42 | -2.26 | -2.30 | -1.24 | 3.44         |
| 8.  | OH + C <sub>2</sub> H <sub>6</sub> → H <sub>2</sub> O + C <sub>2</sub> H <sub>5</sub>             | 3.20  | -0.68 | -0.80 | -1.26 | 0.44  | 0.27         |
| 9.  | F + H <sub>2</sub> → HF + H                                                                       | 1.42  | -5.69 | -4.54 | -5.78 | -3.52 | -6.08        |
| 10. | O + CH <sub>4</sub> → OH + CH <sub>3</sub>                                                        | 13.47 | 7.32  | 7.76  | 7.94  | 8.83  | 11.26        |
| 11. | H + PH <sub>3</sub> → H <sub>2</sub> + PH <sub>2</sub>                                            | 3.10  | -1.06 | 0.38  | -4.15 | 0.65  | -0.35        |
| 12. | H + HO → H <sub>2</sub> + O                                                                       | 10.50 | 4.10  | 7.11  | -0.13 | 7.27  | 0.08         |
| 13. | H + H <sub>2</sub> S → H <sub>2</sub> + HS                                                        | 3.50  | -0.59 | 1.05  | -3.76 | 1.33  | 0.52         |
| 14. | O + HCl → OH + Cl                                                                                 | 9.57  | 1.13  | 2.44  | 1.22  | 3.56  | 7.49         |
| 15. | CH <sub>3</sub> + NH <sub>2</sub> → CH <sub>4</sub> + NH                                          | 8.00  | 6.26  | 5.23  | 4.52  | 6.37  | 6.51         |
| 16. | C <sub>2</sub> H <sub>5</sub> + NH <sub>2</sub> → C <sub>2</sub> H <sub>6</sub> + NH              | 7.50  | 8.83  | 7.14  | 6.45  | 8.28  | 7.80         |
| 17. | NH <sub>2</sub> + C <sub>2</sub> H <sub>6</sub> → NH <sub>3</sub> + C <sub>2</sub> H <sub>5</sub> | 10.40 | 8.89  | 7.48  | 8.33  | 8.82  | 9.97         |
| 18. | NH <sub>2</sub> + CH <sub>4</sub> → NH <sub>3</sub> + CH <sub>3</sub>                             | 14.50 | 11.41 | 10.05 | 10.86 | 11.36 | 12.91        |
| 19. | s-trans cis-C <sub>5</sub> H <sub>8</sub> → s-trans cis-C <sub>5</sub> H <sub>8</sub>             | 38.40 | 38.81 | 35.59 | 36.20 | 36.71 | 37.77        |
|     | MAE                                                                                               | —     | 4.20  | 3.39  | 5.52  | 3.07  | 3.43         |

TABLE X: BACKWARD barrier heights of hydrogen transfer reactions for the HTBH38 test set for the exchange-correlation functional shown in each column using aug-cc-pVQZ basis set. All quantities are in kcal/mol. The experimental values are taken from [1, 4]

|     | Molecule                                                                                          | Expt  | B3LYP | PBE0  | TPSSh | HSE06 | DME-sc-TPSSc |
|-----|---------------------------------------------------------------------------------------------------|-------|-------|-------|-------|-------|--------------|
| 1.  | H + HCl → H <sub>2</sub> + Cl                                                                     | 7.86  | 3.41  | 2.38  | 2.76  | 3.72  | 3.94         |
| 2.  | OH + H <sub>2</sub> → H <sub>2</sub> O + H                                                        | 21.20 | 7.91  | 17.23 | 8.94  | 17.08 | 10.24        |
| 3.  | CH <sub>3</sub> + H <sub>2</sub> → CH <sub>4</sub> + H                                            | 15.30 | 5.77  | 11.88 | 6.23  | 11.94 | 7.30         |
| 4.  | OH + CH <sub>4</sub> → H <sub>2</sub> O + CH <sub>3</sub>                                         | 19.60 | 5.50  | 14.12 | 12.00 | 15.08 | 14.49        |
| 5.  | H + H <sub>2</sub> → H <sub>2</sub> + H                                                           | 9.60  | 5.31  | 5.66  | 1.16  | 6.09  | 2.04         |
| 6.  | OH + NH <sub>3</sub> → H <sub>2</sub> O + NH <sub>2</sub>                                         | 12.70 | 5.25  | 7.61  | 5.83  | 8.81  | 7.54         |
| 7.  | HCl + CH <sub>3</sub> → CH <sub>4</sub> + Cl                                                      | 7.06  | 2.30  | 2.34  | 2.32  | 3.53  | 4.69         |
| 8.  | OH + C <sub>2</sub> H <sub>6</sub> → H <sub>2</sub> O + C <sub>2</sub> H <sub>5</sub>             | 19.90 | 4.10  | 15.89 | 13.46 | 16.78 | 15.31        |
| 9.  | F + H <sub>2</sub> → HF + H                                                                       | 33.40 | 10.02 | 28.03 | 19.13 | 27.51 | 19.35        |
| 10. | O + CH <sub>4</sub> → OH + CH <sub>3</sub>                                                        | 7.90  | 3.29  | 4.19  | 2.75  | 5.27  | 4.06         |
| 11. | H + PH <sub>3</sub> → H <sub>2</sub> + PH <sub>2</sub>                                            | 23.20 | 0.07  | 20.68 | 20.95 | 22.04 | 22.06        |
| 12. | H + HO → H <sub>2</sub> + O                                                                       | 12.87 | 6.77  | 5.73  | 6.81  | 7.11  | 8.92         |
| 13. | H + H <sub>2</sub> S → H <sub>2</sub> + HS                                                        | 16.76 | 0.72  | 12.53 | 13.75 | 14.09 | 14.86        |
| 14. | O + HCl → OH + Cl                                                                                 | 9.36  | 4.76  | 3.48  | 0.67  | 4.78  | 1.54         |
| 15. | CH <sub>3</sub> + NH <sub>2</sub> → CH <sub>4</sub> + NH                                          | 22.40 | 5.16  | 16.59 | 18.06 | 17.64 | 20.75        |
| 16. | C <sub>2</sub> H <sub>5</sub> + NH <sub>2</sub> → C <sub>2</sub> H <sub>6</sub> + NH              | 18.30 | 3.60  | 13.90 | 15.56 | 15.02 | 17.87        |
| 17. | NH <sub>2</sub> + C <sub>2</sub> H <sub>6</sub> → NH <sub>3</sub> + C <sub>2</sub> H <sub>5</sub> | 17.40 | 1.72  | 14.71 | 13.59 | 15.75 | 15.13        |
| 18. | NH <sub>2</sub> + CH <sub>4</sub> → NH <sub>3</sub> + CH <sub>3</sub>                             | 17.80 | 4.26  | 12.69 | 11.69 | 13.75 | 13.89        |
| 19. | s-trans cis-C <sub>5</sub> H <sub>8</sub> → s-trans cis-C <sub>5</sub> H <sub>8</sub>             | 38.40 | 0.41  | 35.59 | 36.20 | 36.71 | 37.77        |
|     | MAE                                                                                               | —     | 4.23  | 4.50  | 6.26  | 3.58  | 4.69         |

TABLE XI: FORWARD barrier heights of non-hydrogen transfer reactions for the NHTBH38/04 test set for the exchange-correlation functional shown in each column using aug-cc-pVQZ basis set. All quantities are in kcal/mol. The experimental values are taken from [1, 4].

|     | Molecule                                                                                          | Expt   | B3LYP  | PBE0   | TPSSh  | HSE06  | DME-sc-TPSSc |
|-----|---------------------------------------------------------------------------------------------------|--------|--------|--------|--------|--------|--------------|
| 1.  | H + N <sub>2</sub> O → OH + N <sub>2</sub>                                                        | 17.13  | 11.39  | 13.93  | 9.41   | 14.42  | 11.06        |
| 2.  | H + HF → HF + H                                                                                   | 42.18  | 30.91  | 33.64  | 29.08  | 34.21  | 32.18        |
| 3.  | H + ClH → HCl + H                                                                                 | 18.00  | 12.75  | 13.69  | 9.06   | 14.25  | 14.84        |
| 4.  | H + FCH <sub>3</sub> → HF + CH <sub>3</sub>                                                       | 30.38  | 21.58  | 25.48  | 19.72  | 25.57  | 22.35        |
| 5.  | H + F <sub>2</sub> → HF + F                                                                       | 2.27   | 43.76  | 47.59  | 40.31  | 47.74  | 44.30        |
| 6.  | CH <sub>3</sub> + FCl → CH <sub>3</sub> F + Cl                                                    | 6.75   | -1.05  | 1.47   | -1.61  | 1.82   | 2.80         |
| 7.  | F <sup>-</sup> + CH <sub>3</sub> F → FCH <sub>3</sub> + F <sup>-</sup>                            | -0.34  | -2.21  | -1.01  | -4.67  | -0.22  | -5.09        |
| 8.  | F <sup>-</sup> ...CH <sub>3</sub> F → FCH <sub>3</sub> ...F <sup>-</sup>                          | 13.38  | 10.46  | 11.90  | 8.19   | 12.09  | 8.88         |
| 9.  | Cl <sup>-</sup> + CH <sub>3</sub> Cl → ClCH <sub>3</sub> + Cl <sup>-</sup>                        | 3.10   | -0.30  | 1.10   | -2.77  | 1.48   | -3.35        |
| 10. | Cl <sup>-</sup> ...CH <sub>3</sub> Cl → ClCH <sub>3</sub> ...Cl <sup>-</sup>                      | 13.41  | 9.12   | 11.14  | 7.21   | 11.09  | 7.65         |
| 11. | F <sup>-</sup> + CH <sub>3</sub> Cl → FCH <sub>3</sub> + Cl <sup>-</sup>                          | -12.54 | -14.73 | -13.73 | -17.25 | -13.08 | -18.46       |
| 12. | F <sup>-</sup> ...CH <sub>3</sub> Cl → FCH <sub>3</sub> ...Cl <sup>-</sup>                        | 3.44   | 0.48   | 1.78   | -1.23  | 1.81   | -1.08        |
| 13. | OH <sup>-</sup> + CH <sub>3</sub> F → HOCH <sub>3</sub> + F <sup>-</sup>                          | -2.44  | -4.00  | -3.29  | -6.56  | -2.52  | -6.53        |
| 14. | OH <sup>-</sup> ...CH <sub>3</sub> F → HOCH <sub>3</sub> ...F <sup>-</sup>                        | 10.96  | 8.16   | 9.21   | 5.64   | 9.38   | 6.62         |
| 15. | H + N <sub>2</sub> → HN <sub>2</sub>                                                              | 14.36  | 7.51   | 8.53   | 4.10   | 9.09   | 6.23         |
| 16. | H + CO → HCO                                                                                      | 3.17   | -0.63  | 0.24   | -4.27  | 0.67   | -2.56        |
| 17. | H + C <sub>2</sub> H <sub>4</sub> → CH <sub>3</sub> CH <sub>2</sub>                               | 1.72   | -0.18  | 0.67   | -3.93  | 1.06   | -3.58        |
| 18. | CH <sub>3</sub> + C <sub>2</sub> H <sub>4</sub> → CH <sub>3</sub> CH <sub>2</sub> CH <sub>2</sub> | 6.85   | 6.05   | 4.12   | 4.16   | 5.24   | 4.72         |
| 19. | HCN → CNH                                                                                         | 48.07  | 47.39  | 46.30  | 47.41  | 46.55  | 47.49        |
|     | MAE                                                                                               | —      | 6.12   | 5.14   | 8.10   | 4.75   | 7.12         |

TABLE XII: BACKWARD barrier heights of non-hydrogen transfer reactions for the NHTBH38/04 test set for the exchange-correlation functional shown in each column using aug-cc-pVQZ basis set. All quantities are in kcal/mol. The experimental values are taken from [1, 4].

|     | Molecule                                                                                          | Expt   | B3LYP  | PBE0   | TPSSh  | HSE06  | DME-sc-TPSSc |
|-----|---------------------------------------------------------------------------------------------------|--------|--------|--------|--------|--------|--------------|
| 1.  | H + N <sub>2</sub> O → OH + N <sub>2</sub>                                                        | 82.27  | 73.12  | 69.18  | 66.70  | 71.42  | 66.37        |
| 2.  | H + HF → HF + H                                                                                   | 42.18  | 30.91  | 33.64  | 29.08  | 34.21  | 32.18        |
| 3.  | H + ClH → HCl + H                                                                                 | 18.00  | 12.75  | 13.69  | 9.06   | 14.25  | 14.84        |
| 4.  | H + FCH <sub>3</sub> → HF + CH <sub>3</sub>                                                       | 57.02  | 48.61  | 49.82  | 45.83  | 51.06  | 47.17        |
| 5.  | H + F <sub>2</sub> → HF + F                                                                       | 105.80 | 145.94 | 149.45 | 138.61 | 150.61 | 137.39       |
| 6.  | CH <sub>3</sub> + FCl → CH <sub>3</sub> F + Cl                                                    | 59.16  | 51.06  | 53.51  | 47.81  | 53.81  | 48.25        |
| 7.  | F <sup>-</sup> + CH <sub>3</sub> F → FCH <sub>3</sub> + F <sup>-</sup>                            | -0.34  | -2.21  | -1.01  | -4.67  | -0.22  | -5.09        |
| 8.  | F <sup>-</sup> ...CH <sub>3</sub> F → FCH <sub>3</sub> ...F <sup>-</sup>                          | 13.38  | 10.46  | 11.90  | 8.19   | 12.09  | 8.88         |
| 9.  | Cl <sup>-</sup> + CH <sub>3</sub> Cl → ClCH <sub>3</sub> + Cl <sup>-</sup>                        | 3.10   | -0.30  | 1.10   | -2.77  | 1.48   | -3.35        |
| 10. | Cl <sup>-</sup> ...CH <sub>3</sub> Cl → ClCH <sub>3</sub> ...Cl <sup>-</sup>                      | 13.41  | 9.12   | 11.14  | 7.21   | 11.09  | 7.65         |
| 11. | F <sup>-</sup> + CH <sub>3</sub> Cl → FCH <sub>3</sub> + Cl <sup>-</sup>                          | 20.11  | 18.42  | 19.68  | 16.76  | 20.16  | 16.70        |
| 12. | F <sup>-</sup> ...CH <sub>3</sub> Cl → FCH <sub>3</sub> ...Cl <sup>-</sup>                        | 29.42  | 26.42  | 28.19  | 25.01  | 28.26  | 25.86        |
| 13. | OH <sup>-</sup> + CH <sub>3</sub> F → HOCH <sub>3</sub> + F <sup>-</sup>                          | 17.66  | 15.91  | 17.63  | 12.70  | 18.35  | 12.33        |
| 14. | OH <sup>-</sup> ...CH <sub>3</sub> F → HOCH <sub>3</sub> ...F <sup>-</sup>                        | 47.20  | 45.08  | 48.73  | 42.72  | 48.29  | 41.24        |
| 15. | H + N <sub>2</sub> → HN <sub>2</sub>                                                              | 10.61  | 10.76  | 11.54  | 9.40   | 11.43  | 8.01         |
| 16. | H + CO → HCO                                                                                      | 22.68  | 24.54  | 25.38  | 23.98  | 25.19  | 22.44        |
| 17. | H + C <sub>2</sub> H <sub>4</sub> → CH <sub>3</sub> CH <sub>2</sub>                               | 41.75  | 41.80  | 44.19  | 41.46  | 44.14  | 38.96        |
| 18. | CH <sub>3</sub> + C <sub>2</sub> H <sub>4</sub> → CH <sub>3</sub> CH <sub>2</sub> CH <sub>2</sub> | 32.97  | 29.48  | 34.49  | 29.86  | 33.60  | 29.08        |
| 19. | HCN → CNH                                                                                         | 32.82  | 33.52  | 32.68  | 32.73  | 32.81  | 31.83        |
|     | MAE:                                                                                              |        | 5.76   | 5.25   | 7.24   | 4.91   | 6.92         |



TABLE XIII: Thermochemistry of  $\pi$  system for the  $\pi$ TC13 test set for functional shown in each column. All quantities are in kcal/mol. The 6-311++G(3df,3pd) basis set is used. The experimental values are taken from [1, 4].

| Molecule | Expt   | B3LYP  | PBE0   | TPSSh  | HSE06  | DME-sc-TPSSc |
|----------|--------|--------|--------|--------|--------|--------------|
| E2-E1    | -1.40  | -2.23  | -2.20  | -2.58  | -1.99  | -2.99        |
| E4-E3    | -8.80  | -2.40  | -2.98  | -1.38  | -2.84  | -0.57        |
| E6-E5    | -14.30 | -5.54  | -6.41  | -3.93  | -6.04  | -2.68        |
| P-2      | 167.81 | 168.54 | 170.77 | 172.06 | 171.29 | 172.13       |
| P-4      | 193.45 | 198.54 | 198.25 | 200.96 | 199.21 | 201.24       |
| P-6      | 209.68 | 216.32 | 215.73 | 218.84 | 216.79 | 230.76       |
| P-8      | 219.67 | 227.62 | 226.90 | 230.31 | 228.01 | 239.01       |
| P-10     | 225.95 | 235.68 | 234.83 | 238.44 | 236.04 | 217.41       |
| SB-2     | 214.46 | 215.37 | 216.54 | 217.24 | 216.97 | 231.60       |
| SB-4     | 226.15 | 229.77 | 230.63 | 231.63 | 231.15 | 241.36       |
| SB-6     | 233.44 | 239.46 | 240.09 | 241.38 | 240.69 | 248.29       |
| SB-8     | 238.16 | 246.22 | 246.69 | 248.23 | 247.38 | 248.29       |
| SB-10    | 240.97 | 251.29 | 251.61 | 253.41 | 252.42 | 253.54       |
| MAE      | —      | 5.77   | 5.89   | 7.82   | 6.54   | 8.17         |

TABLE XIV: Alkyl Bond Dissociation Energies for the ABDE12 test set for functional shown in each column. All quantities are in kcal/mol. The aug-cc-pVQZ basis set is used. The experimental values are taken from [1, 4].

| Molecule                        | Expt   | B3LYP  | PBE0   | TPSSh  | HSE06  | DME-sc-TPSSc |
|---------------------------------|--------|--------|--------|--------|--------|--------------|
| C <sub>2</sub> H <sub>6</sub>   | 97.39  | 91.71  | 95.29  | 90.41  | 92.85  | 90.17        |
| iPr-CH <sub>3</sub>             | 95.00  | 84.99  | 89.16  | 83.90  | 86.46  | 86.79        |
| C <sub>2</sub> H <sub>6</sub> O | 89.79  | 82.33  | 85.30  | 81.57  | 82.71  | 83.49        |
| iPr-OCH <sub>3</sub>            | 91.51  | 79.68  | 83.07  | 78.90  | 80.16  | 83.65        |
| Et-H                            | 108.92 | 106.34 | 104.71 | 106.45 | 103.80 | 105.98       |
| Et-CH <sub>3</sub>              | 95.89  | 88.27  | 92.13  | 87.08  | 89.61  | 88.22        |
| Et-OCH <sub>3</sub>             | 95.26  | 82.09  | 85.23  | 81.27  | 82.55  | 84.38        |
| Et-OH                           | 100.29 | 93.34  | 95.88  | 92.10  | 93.25  | 94.27        |
| tBu-H                           | 103.86 | 99.59  | 98.08  | 99.76  | 97.10  | 100.71       |
| tBu-CH <sub>3</sub>             | 93.67  | 81.64  | 86.19  | 80.68  | 83.24  | 85.75        |
| tBu-OCH <sub>3</sub>            | 89.27  | 75.87  | 79.64  | 75.26  | 76.41  | 82.07        |
| tBu-OH                          | 115.02 | 90.95  | 93.92  | 89.60  | 90.92  | 95.13        |
| MAE                             |        | 9.91   | 7.26   | 10.73  | 9.73   | 7.93         |

TABLE XV: Isomerization Energies for the IsoL6 test set for functional shown in each column. All quantities are in kcal/mol. The 6-311++G(3df,3pd) basis set is used. The experimental values are taken from [1, 4].

| Molecule | Expt  | B3LYP | PBE0  | TPSSh | HSE06 | DME-sc-TPSSc |
|----------|-------|-------|-------|-------|-------|--------------|
| 10-      | 6.82  | 2.72  | 5.85  | 2.50  | 5.31  | 2.64         |
| 13-      | 33.52 | 30.24 | 31.47 | 28.68 | 31.34 | 29.21        |
| 14-      | 5.30  | 3.96  | 5.75  | 3.40  | 5.14  | 3.42         |
| 20-      | 4.66  | 4.28  | 5.13  | 4.25  | 5.04  | 3.19         |
| 3-       | 9.77  | 7.39  | 11.40 | 8.22  | 10.27 | 8.39         |
| 9-       | 21.66 | 17.97 | 18.68 | 16.15 | 17.96 | 20.41        |
| MAE      |       | 2.54  | 1.44  | 3.10  | 1.42  | 2.42         |

TABLE XVI: Reaction Energies for the HC7 test set for functional shown in each column. All quantities are in kcal/mol. The 6-311++G(3df,3pd) basis set is used. The experimental values are taken from [1, 4].

| Molecule                                                                        | Expt   | B3LYP  | PBE0   | TPSSh  | HSE06  | DME-sc-TPSSc |
|---------------------------------------------------------------------------------|--------|--------|--------|--------|--------|--------------|
| E22 - E1                                                                        | 14.34  | 0.12   | 24.43  | 16.50  | 20.58  | 16.44        |
| E31 - E1                                                                        | 25.02  | 2.67   | 33.42  | 21.35  | 28.22  | 20.98        |
| $(\text{CH}_3)_3\text{CC}(\text{CH}_3)_3 \rightarrow \text{n-C}_8\text{H}_{18}$ | 1.90   | -7.86  | -4.54  | -5.80  | -6.45  | 3.21         |
| $\text{n-C}_6\text{H}_{14} + 4 \text{CH}_4 \rightarrow 5\text{C}_2\text{H}_6$   | 9.81   | 4.64   | 5.85   | 4.36   | 5.15   | 9.11         |
| $\text{n-C}_8\text{H}_{18} + 6 \text{CH}_4 \rightarrow 7\text{C}_2\text{H}_6$   | 14.84  | 6.86   | 8.67   | 6.44   | 7.63   | 13.64        |
| adamantane $\rightarrow 3 \text{C}_2\text{H}_4 + 2 \text{C}_2\text{H}_2$        | 193.99 | 164.78 | 215.80 | 185.27 | 201.95 | 187.98       |
| biclo[2.2.2]octane $\rightarrow 3 \text{C}_2\text{H}_4 + \text{C}_2\text{H}_2$  | 127.22 | 104.36 | 140.87 | 119.13 | 131.04 | 120.04       |
| MAE                                                                             |        | 15.93  | 10.07  | 6.31   | 5.92   | 3.21         |
